# Supplementary material
Source: PubMed Central journal article supplement (PMC1464343)

Fig. SM1

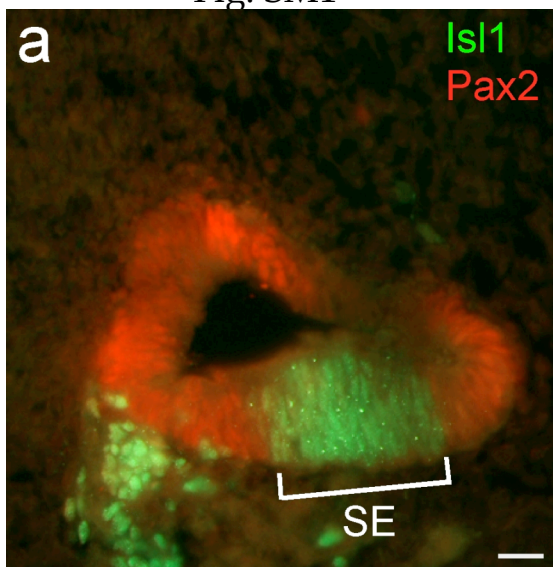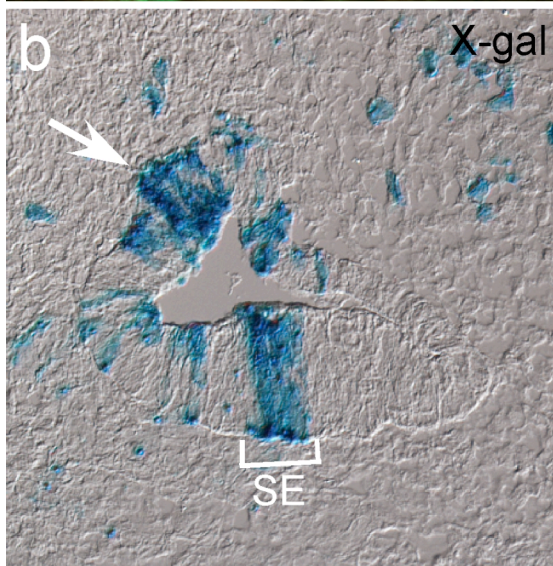

Supplement: pnas_0510631103_1.pdf [file pnas_0510631103_1.pdf]

Fig. SM2

Control

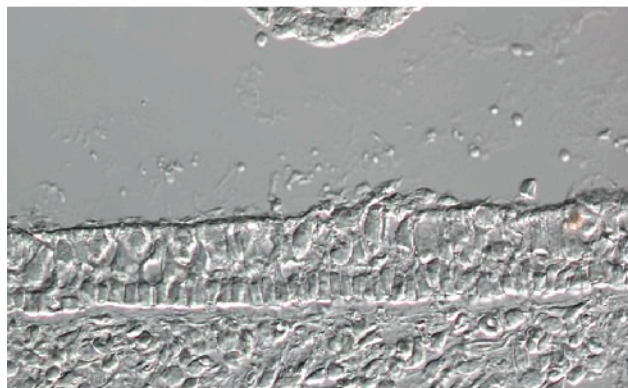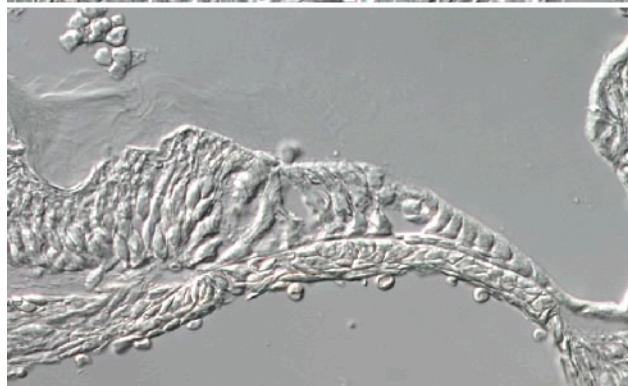

Pou4f3-Cre-Rosa26

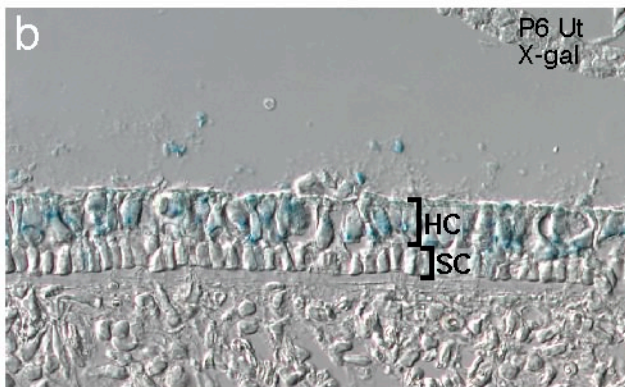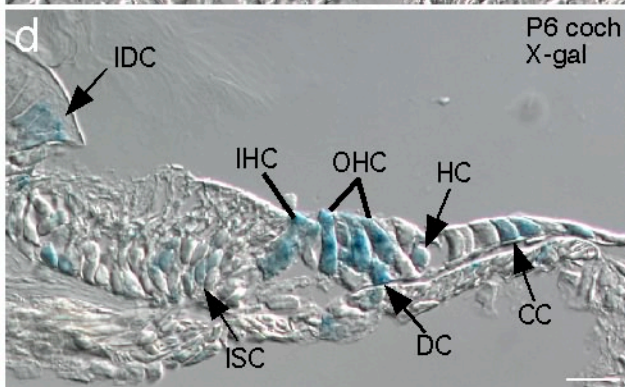

Supplement: pnas_0510631103_2.pdf [file pnas_0510631103_2.pdf]

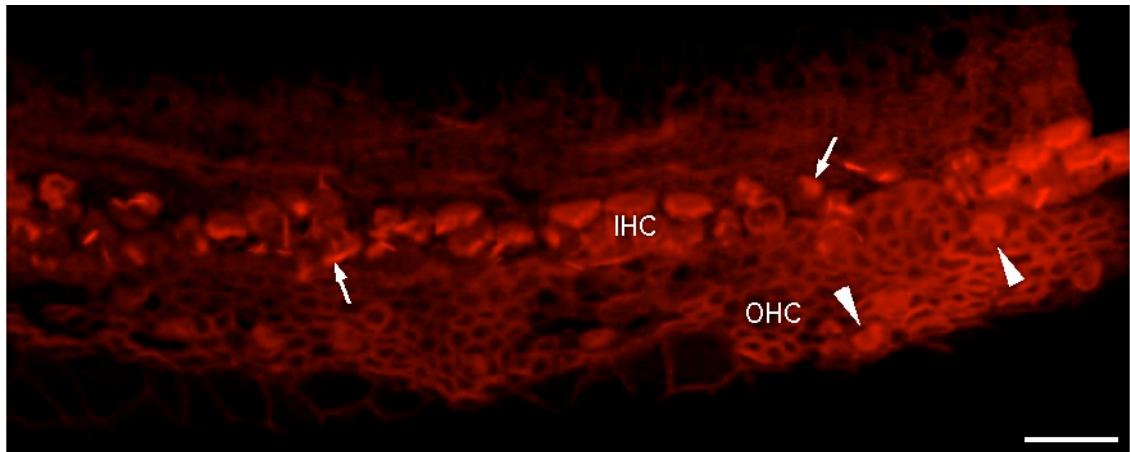

IHC

OHC

Supplement: pnas_0510631103_3.pdf [file pnas_0510631103_3.pdf]

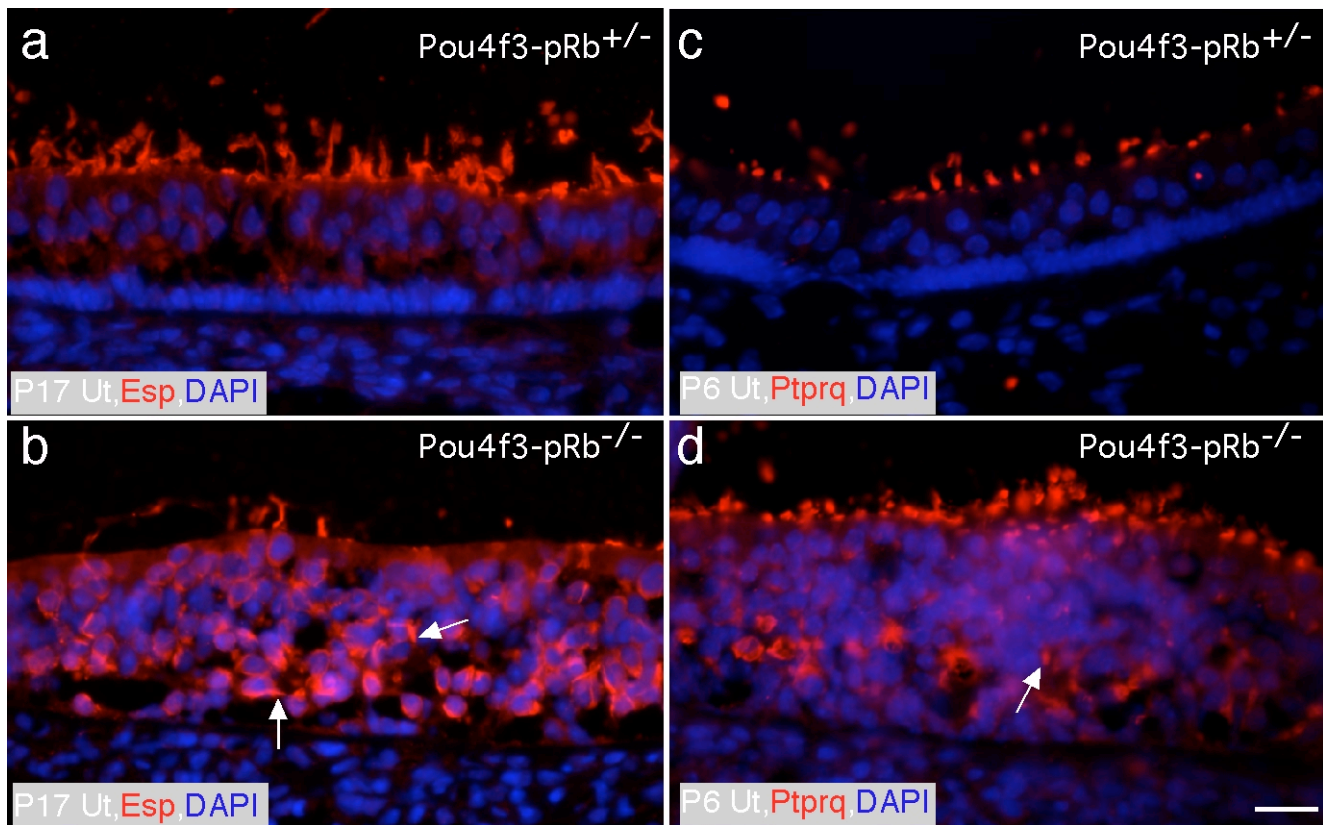

Supplement: pnas_0510631103_4.pdf [file pnas_0510631103_4.pdf]

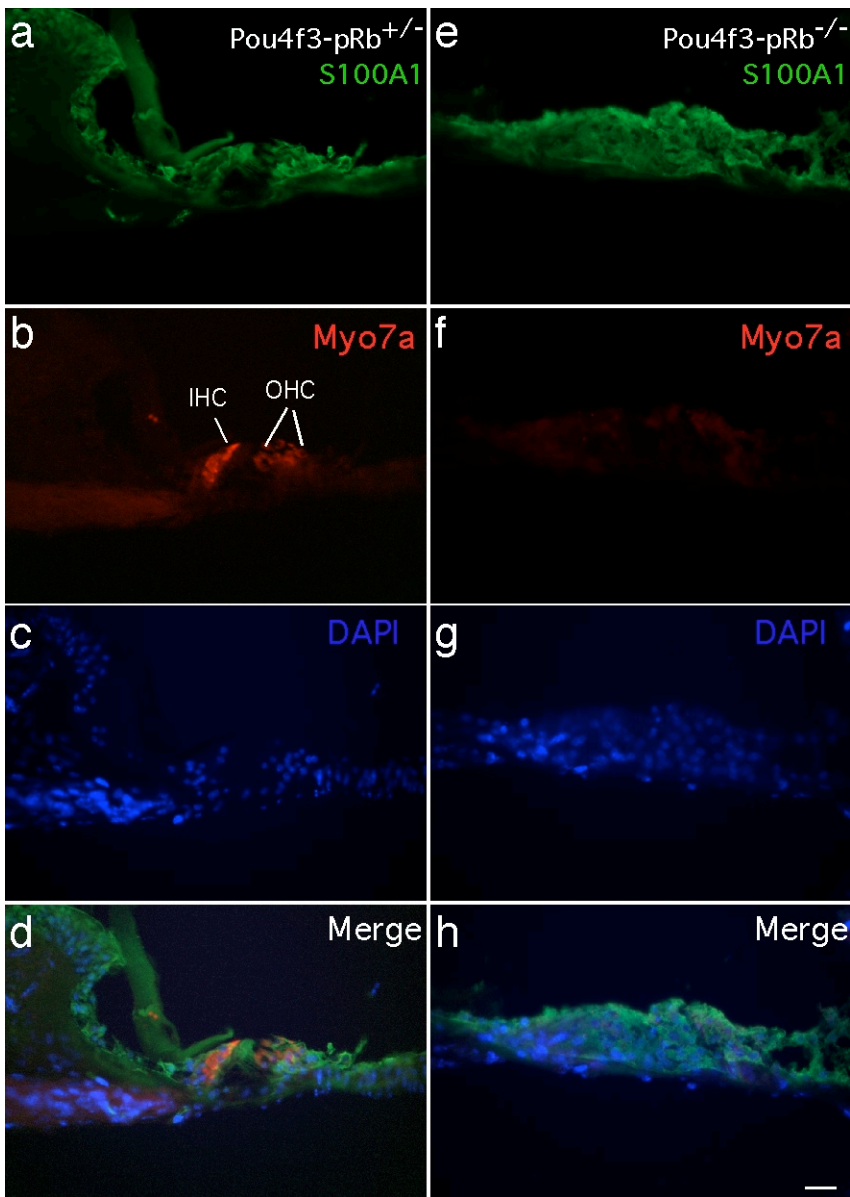

Supplement: pnas_0510631103_5.pdf [file pnas_0510631103_5.pdf]

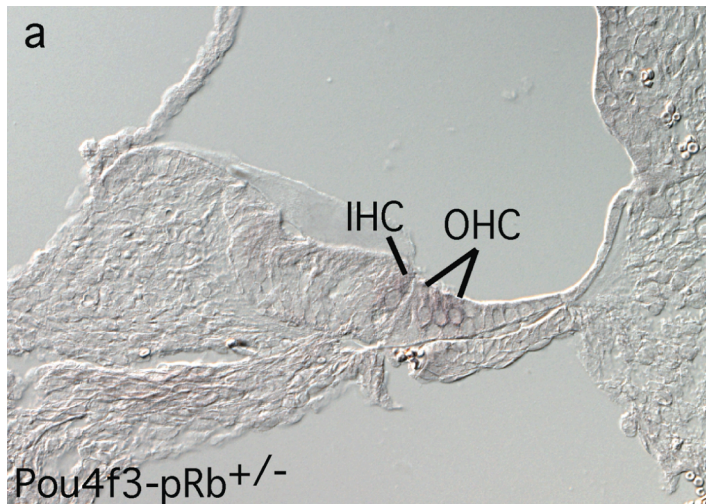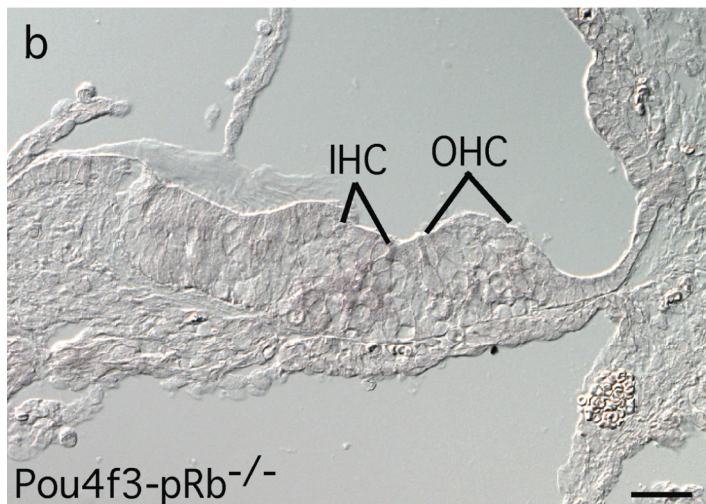

Supplement: pnas_0510631103_6.pdf [file pnas_0510631103_6.pdf]

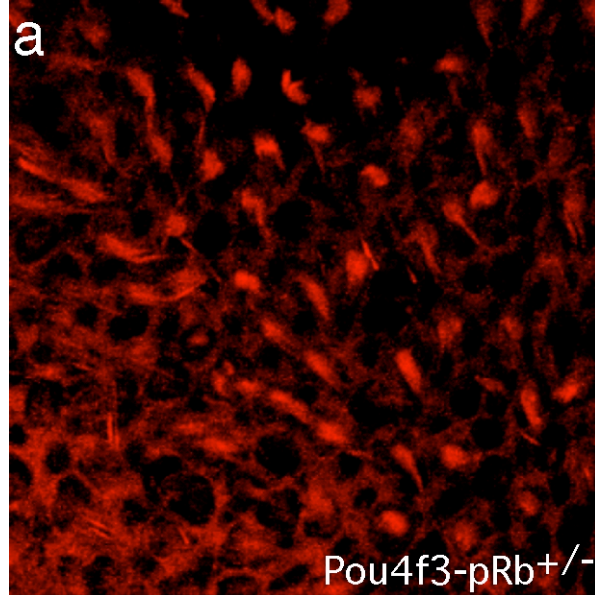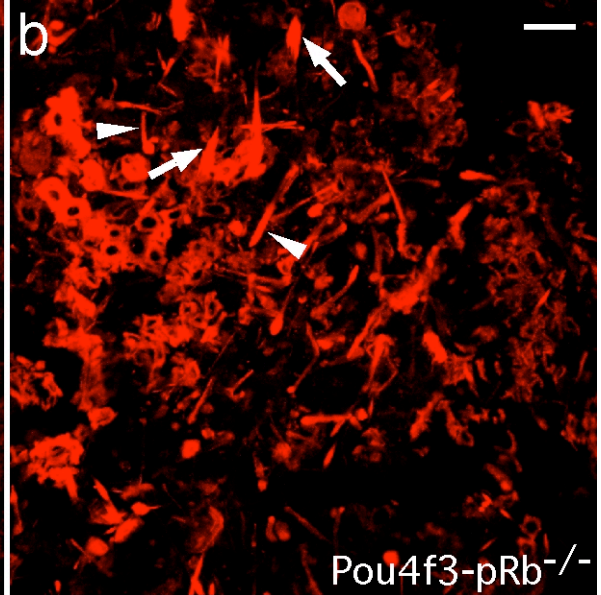

Supplement: pnas_0510631103_7.pdf [file pnas_0510631103_7.pdf]

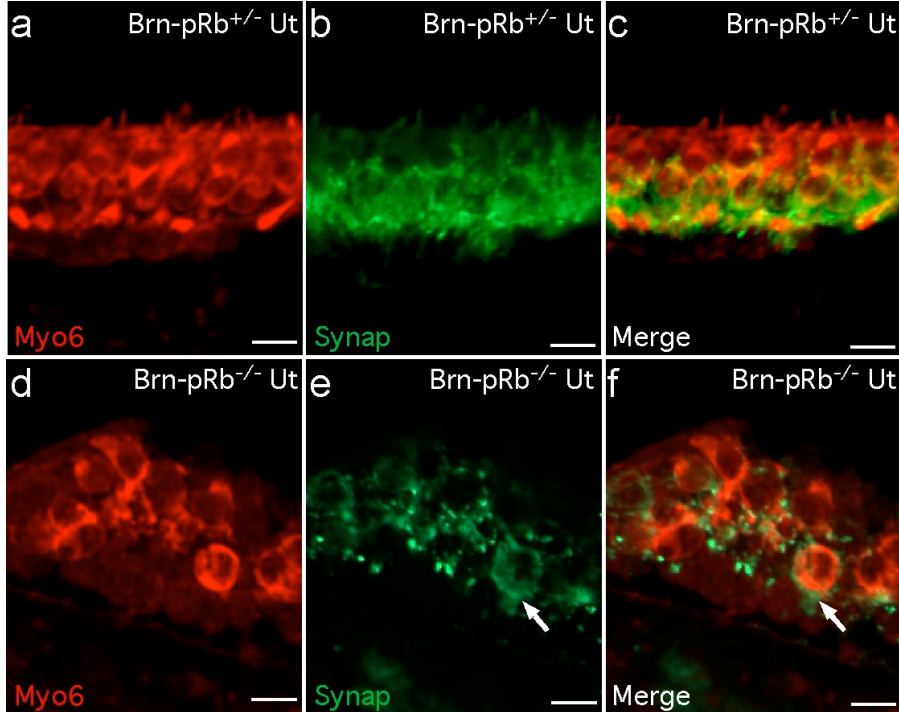

Supplement: pnas_0510631103_8.pdf [file pnas_0510631103_8.pdf]
